# Supplementary material for: Synthesis and characterization of a supported Pd complex on volcanic pumice laminates textured by cellulose for facilitating Suzuki–Miyaura cross-coupling reactions
Source: Royal Society of Chemistry journal article supplement (doi:10.1039/d0ra04521g), 2020-01-01
Supplement: d0ra04521g1.pdf [file d0ra04521g1.pdf]

## Supporting Information

---

### **Synthesis and characterization of a supported Pd complex on volcanic pumice laminates textured by cellulose for facilitating Suzuki–Miyaura cross-coupling reactions**

Siavash Salek Soltani<sup>1</sup>, Reza Taheri-Ledari<sup>2,a</sup>, S. Morteza F. Farnia<sup>\*,1</sup>, Ali Maleki<sup>\*,2</sup>, Alireza Foroumadi<sup>\*,3,4</sup>

<sup>1</sup> School of Chemistry, College of Science, University of Tehran, Tehran, Iran

<sup>2</sup> Catalysts and Organic Synthesis Research Laboratory, Department of Chemistry, Iran University of Science and Technology, Tehran16846-13114, Iran

<sup>3</sup> Drug Design and Development Research Center, The Institute of Pharmaceutical Sciences (TIPS), Tehran University of Medical Sciences, Tehran, Iran

<sup>4</sup> Department of Medicinal Chemistry, Faculty of Pharmacy, Tehran University of Medical Sciences, Tehran, Iran

<sup>a</sup> Co-first author.

\*Corresponding author's information: S. Morteza F. Farnia: [mfarnia@khayam.ut.ac.ir](mailto:mfarnia@khayam.ut.ac.ir) (Tel: +98 2166495291); Ali Maleki: [maleki@iust.ac.ir](mailto:maleki@iust.ac.ir) (Fax: +98-21-73021584; Tel: +98-21-77240540-50); Alireza Foroumadi: [aforoumadi@yahoo.com](mailto:aforoumadi@yahoo.com) (Tel: +98 2166954708).

 Author's ORCID numbers:

Siavash Salek Soltani: 0000-0001-5927-4039

Reza Taheri-Ledari: 0000-0002-6511-9411

S. Morteza F. Farnia: 0000-0001-9770-2284

Ali Maleki: 0000-0001-5490-3350

Alireza Foroumadi: 0000-0003-2416-5611

---

| <b>Content</b>                                                                         | <b>Page</b> |
|----------------------------------------------------------------------------------------|-------------|
| <b>Table S1.</b> A brief list of the applied materials and equipment                   | <b>S3</b>   |
| <b>Figure S1.</b> <sup>1</sup> H-NMR spectrum of biphenyl ( <b>a</b> )                 | <b>S4</b>   |
| <b>Figure S2.</b> <sup>1</sup> H-NMR spectrum of 4-carbaldehyde-biphenyl ( <b>b</b> )  | <b>S5</b>   |
| <b>Figure S3.</b> <sup>1</sup> H-NMR spectrum of 4-methanol-biphenyl ( <b>c</b> )      | <b>S6</b>   |
| <b>Figure S4.</b> <sup>1</sup> H-NMR spectrum of 4-methyl-biphenyl ( <b>d</b> )        | <b>S7</b>   |
| <b>Figure S5.</b> <sup>1</sup> H-NMR spectrum of 4-methoxy-biphenyl ( <b>e</b> )       | <b>S8</b>   |
| <b>Figure S6.</b> <sup>1</sup> H-NMR spectrum of 4-nitro-biphenyl ( <b>f</b> )         | <b>S9</b>   |
| <b>Figure S7.</b> <sup>1</sup> H-NMR spectrum of 1-biphenyl-4-yl-ethanone ( <b>g</b> ) | <b>S10</b>  |
| <b>Figure S8.</b> <sup>1</sup> H-NMR spectrum of biphenyl-4-carbonitrile ( <b>h</b> )  | <b>S11</b>  |
| <b>Figure S9.</b> <sup>1</sup> H-NMR spectrum of 2-methyl-biphenyl ( <b>i</b> )        | <b>S12</b>  |
| <b>Figure S10.</b> <sup>1</sup> H-NMR spectrum of biphenyl-3-ol ( <b>j</b> )           | <b>S13</b>  |
| <b>Figure S11.</b> Size distribution diagram of the formed Pd nanoparticles            | <b>S14</b>  |
| <b>Calculations of mol% of VPMP@CLS-Pd catalyst</b>                                    | <b>S15</b>  |

**Table S1.** A brief list of the applied materials and equipment.

| Material / instrument               | Brand                                         |
|-------------------------------------|-----------------------------------------------|
| Pumice powder                       | Was purchased from a market in Tehran, IRAN   |
| Hydrochloric acid                   | Merck, 37%                                    |
| Cellulose powder                    | Sigma Aldrich (fibers, medium)                |
| Palladium chloride                  | Sigma Aldrich (99%)                           |
| Potassium hydroxide                 | Merck, pellets for analysis                   |
| Potassium carbonate                 | Sigma Aldrich (ACS reagent)                   |
| Sodium borohydride                  | Sigma Aldrich ( $\geq 98.0\%$ )               |
| Triphenylphosphine                  | Sigma Aldrich (for synthesis)                 |
| Solvents                            | Merck                                         |
| Aryl halide derivatives             | Sigma Aldrich                                 |
| Phenylboronic acid                  | Sigma Aldrich (95.0%)                         |
| Silica gel                          | Sigma Aldrich (for column chromatography, 60) |
| Ball mill                           | Retsch PM-100, Retsch GmbH & amp, Germany     |
| Furnace                             | Muffle Furnace (Omron E5CC)                   |
| Heater-stirrer                      | HEIDOLPH Magnetic Stirrer with Heating        |
| Ultrasound cleaner bath             | KQ-250 DE                                     |
| Oven                                | Memmert (UN30)                                |
| Crucible                            | EISCO (porcelain)                             |
| Glassware                           | Isolab                                        |
| TLC plate                           | Merck (0.2 mm, 60 F254 aluminium sheets)      |
| FT-IR spectrometer                  | Shimadzu IR-470 (KBr pellets)                 |
| EDX spectrometer                    | Numerix DXP-X10P                              |
| VSM                                 | Lakeshore 7407                                |
| TGA                                 | STA504                                        |
| FESEM                               | Sigma-Zeiss microscope with attached camera   |
| TEM                                 | Philips CM-12                                 |
| BET                                 | Micromeritics ASAP 2010                       |
| XPS                                 | ESCALAB Xi $\rho$ , and Thermo Scientific     |
| Melting point measurement apparatus | Capillary melting point                       |
| NMR spectrometer                    | Bruker FT-NMR                                 |

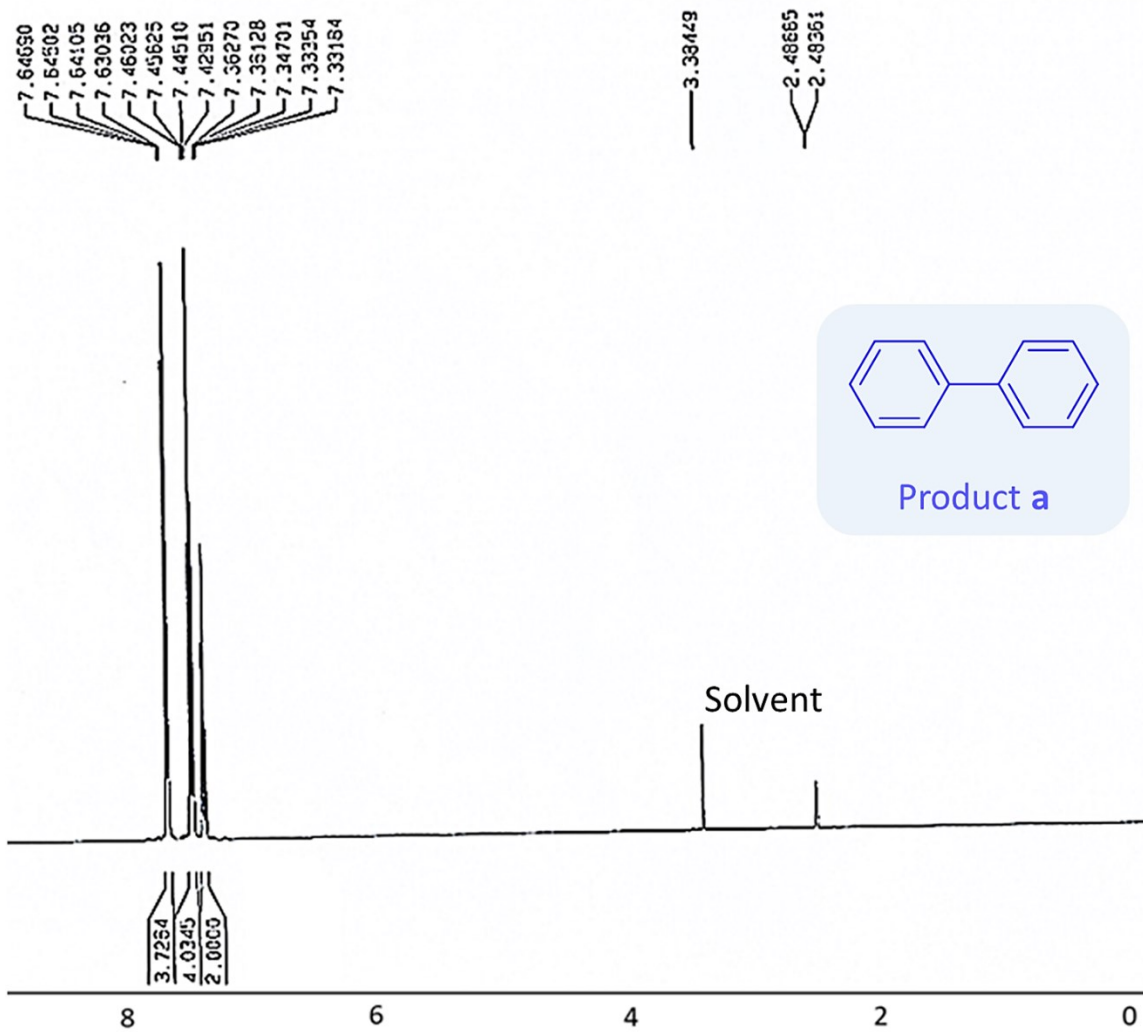

Figure S1. <sup>1</sup>H-NMR spectrum of biphenyl (a).

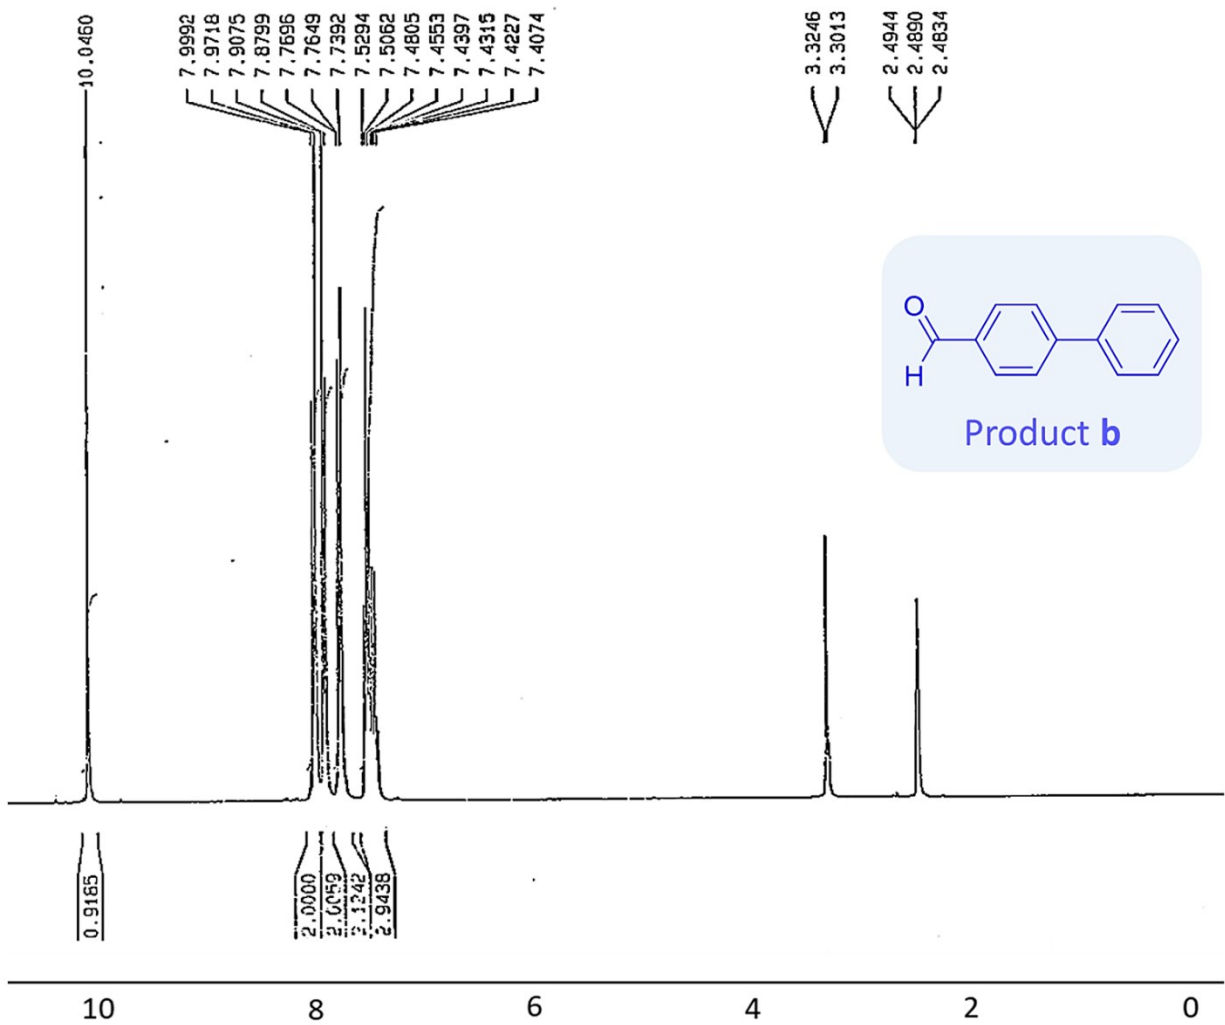

Figure S2.  $^1\text{H-NMR}$  spectrum of 4-carbaldehyde-biphenyl (**b**).

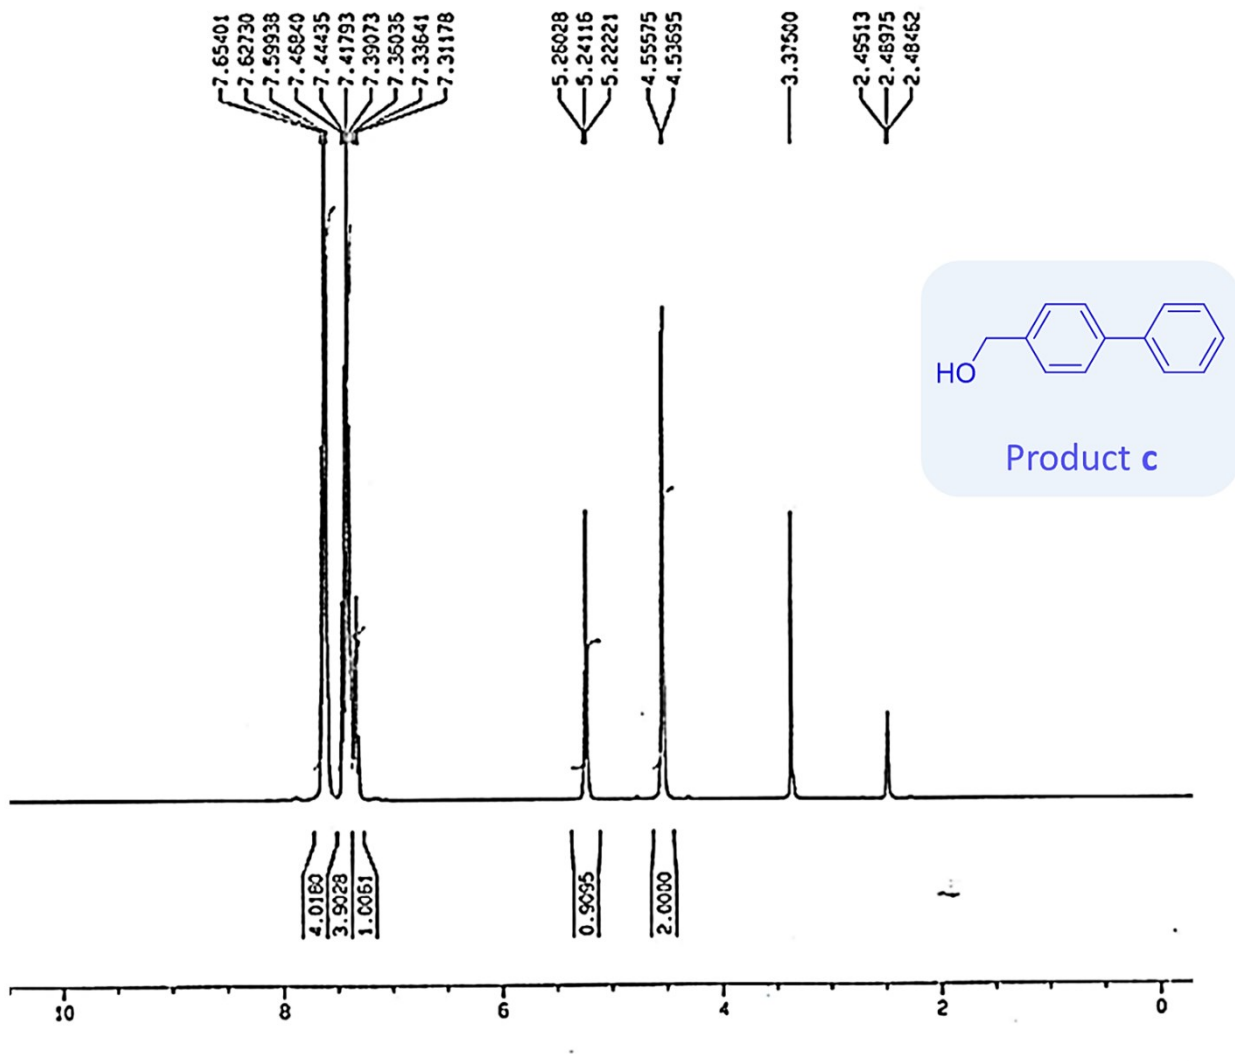

Figure S3. <sup>1</sup>H-NMR spectrum of 4-methanol-biphenyl (c).

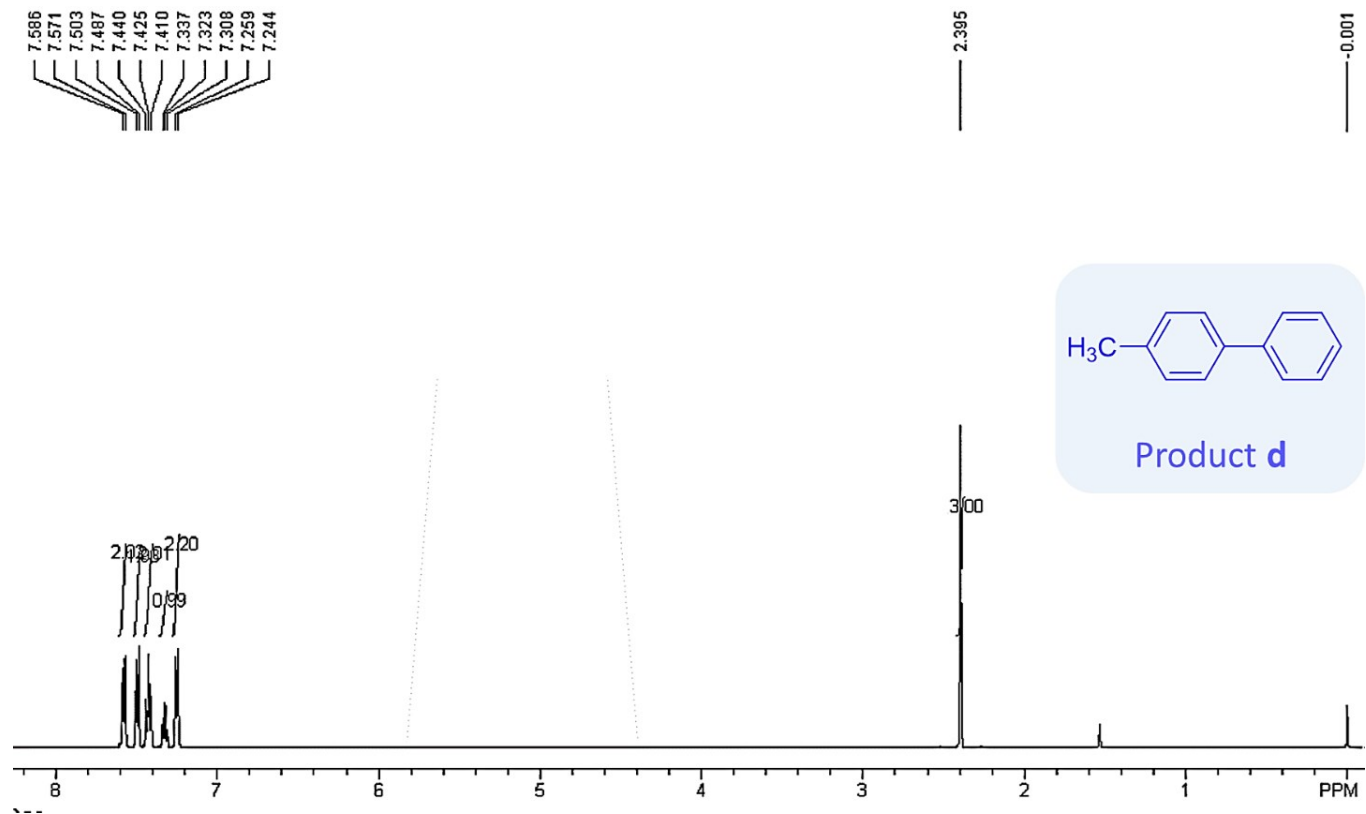

Figure S4. <sup>1</sup>H-NMR spectrum of 4-methyl-biphenyl (d).

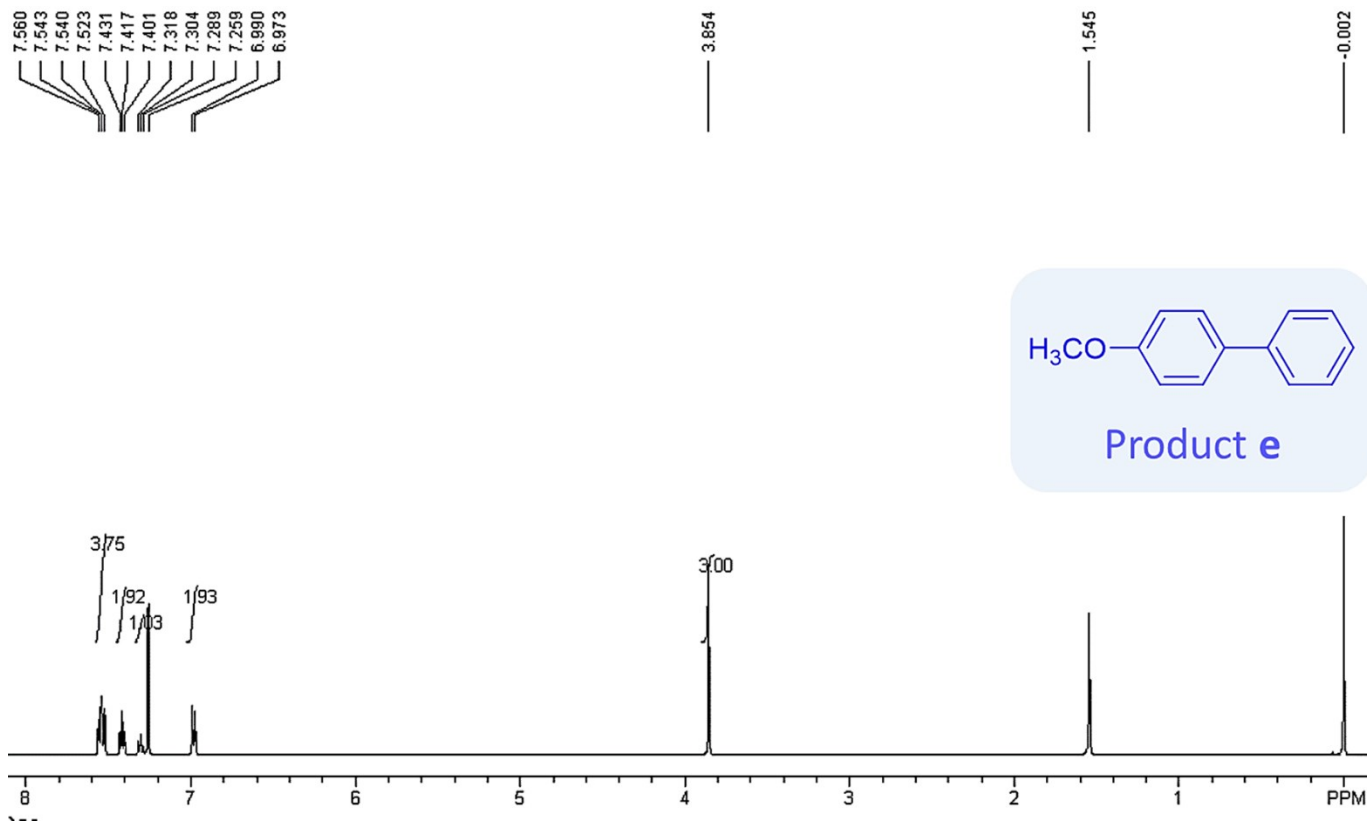

**Figure S5.** <sup>1</sup>H-NMR spectrum of 4-methoxy-biphenyl (e).



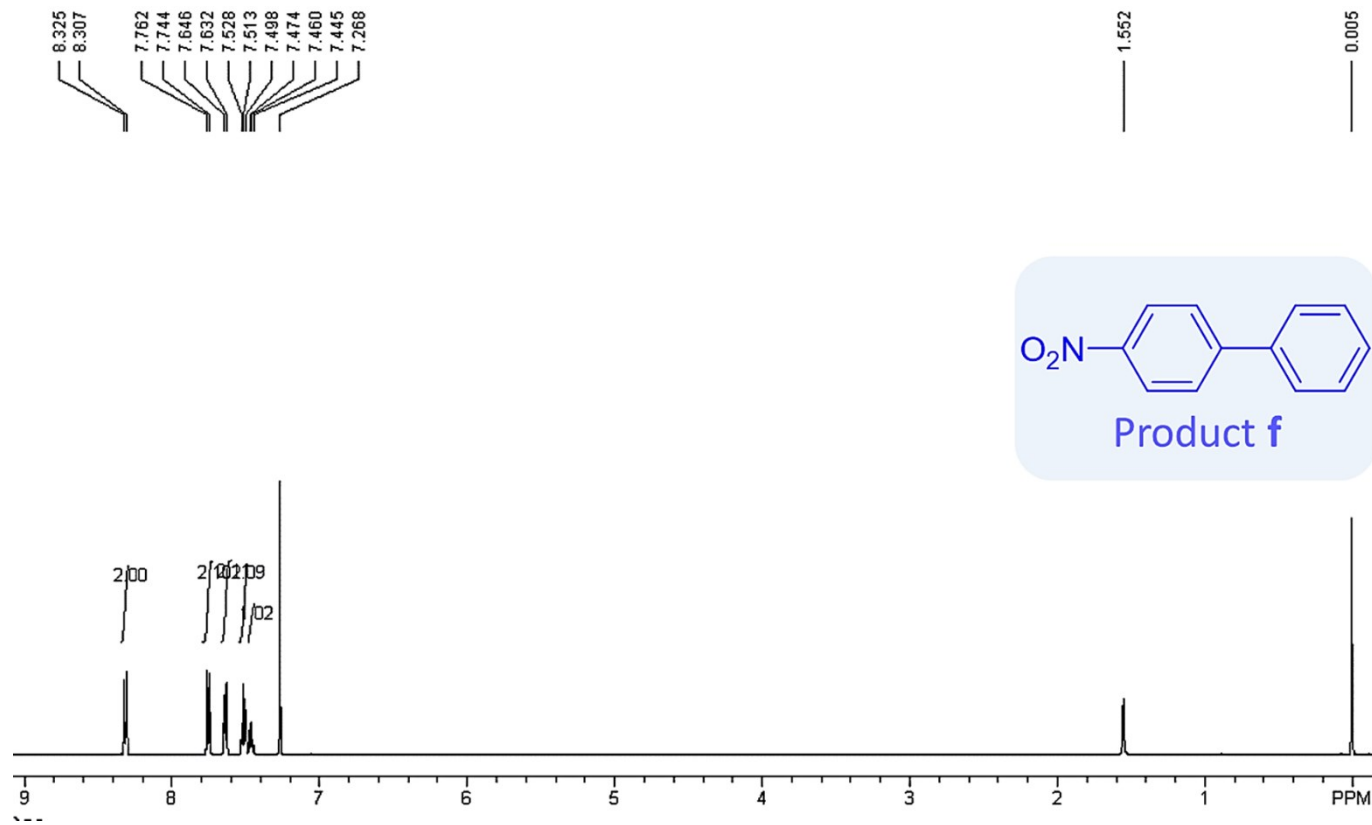

**Figure S6.** <sup>1</sup>H-NMR spectrum of 4-nitro-biphenyl (**f**).

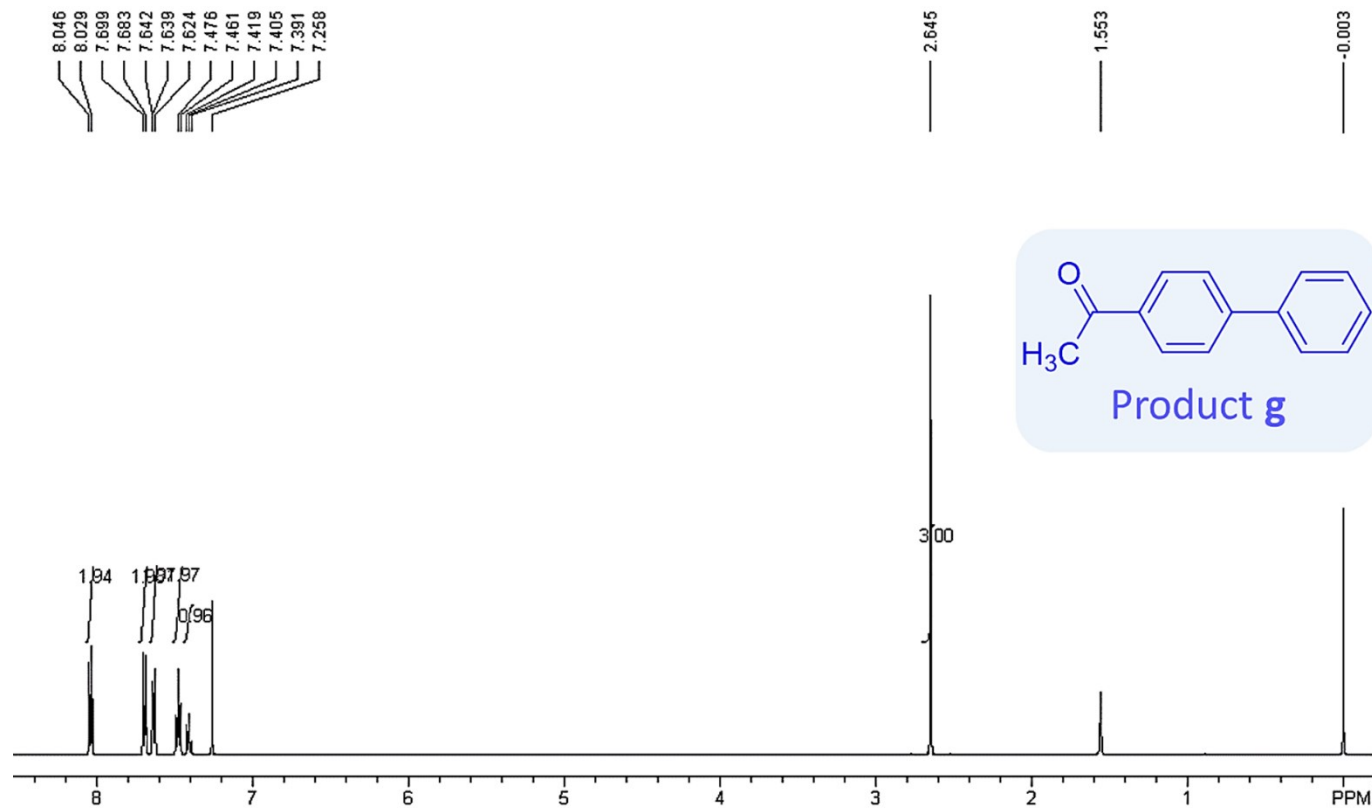

Figure S7. <sup>1</sup>H-NMR spectrum of 1-biphenyl-4-yl-ethanone (g).

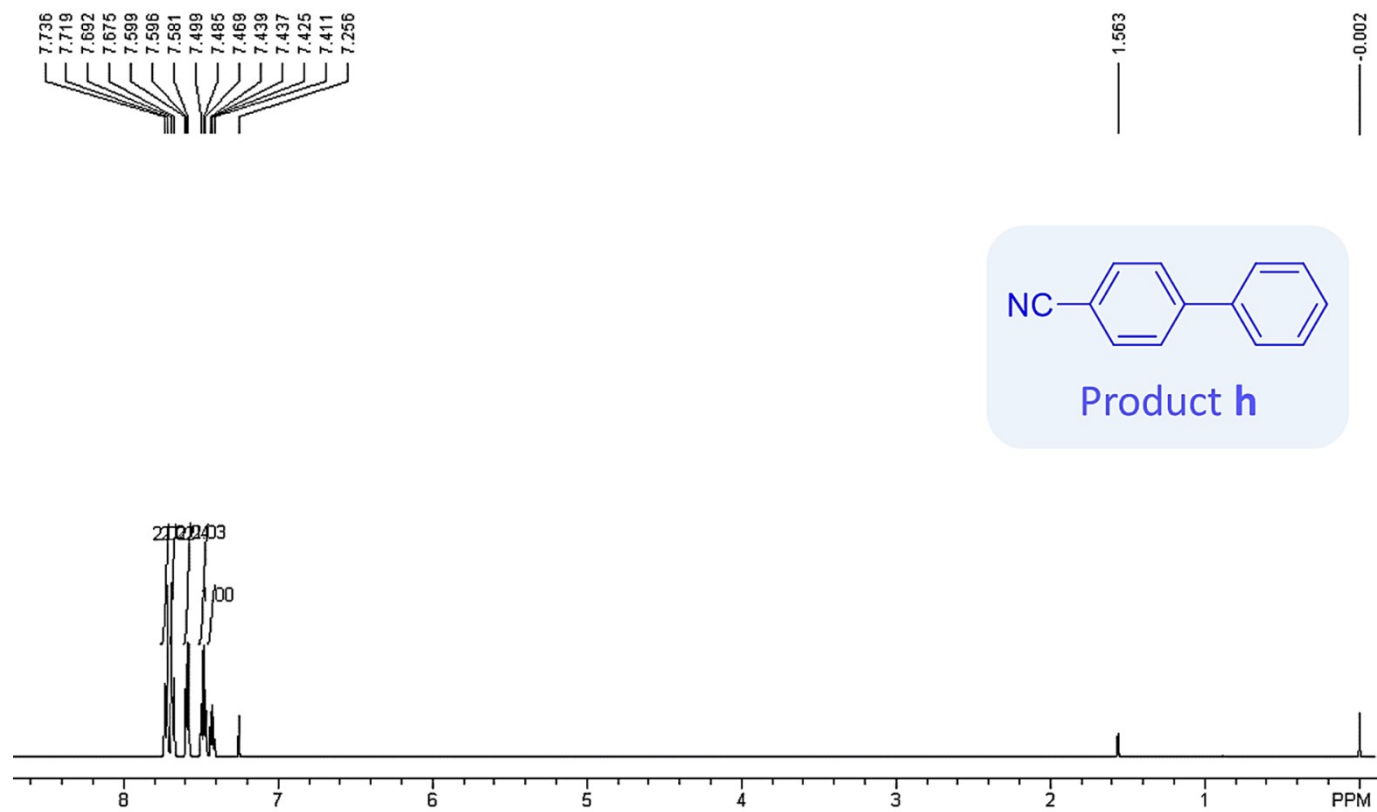

**Figure S8.**  $^1\text{H-NMR}$  spectrum of biphenyl-4-carbonitrile (**h**).

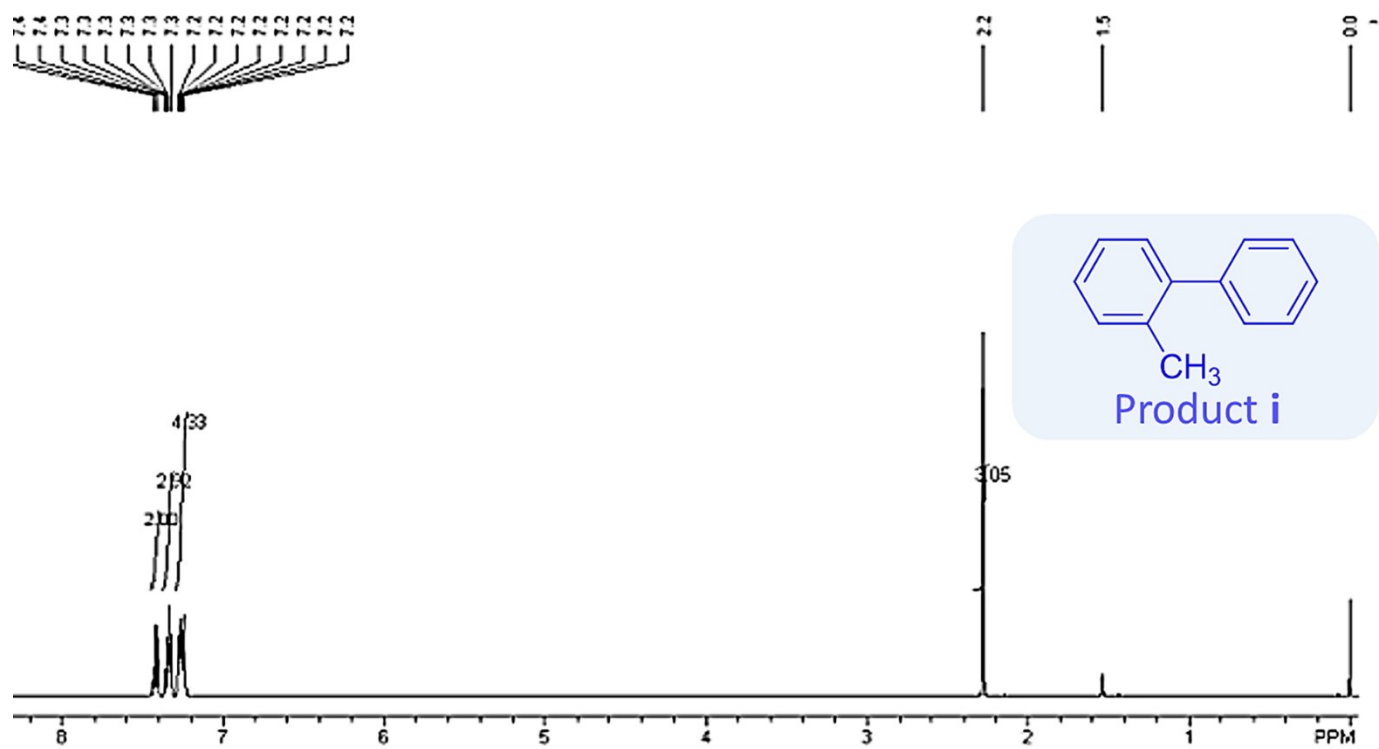

**Figure S9.**  $^1\text{H-NMR}$  spectrum of 2-methyl-biphenyl (i).

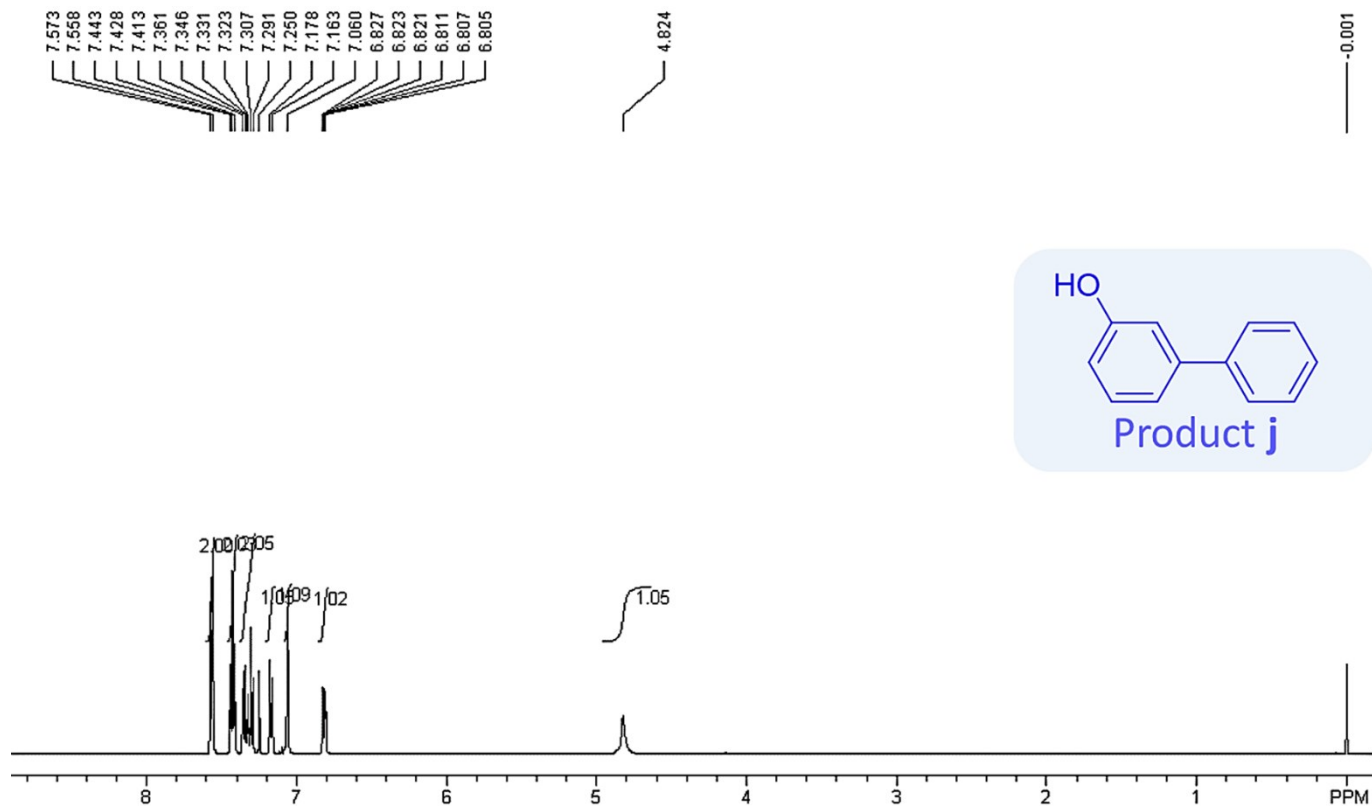

**Figure S10.** <sup>1</sup>H-NMR spectrum of biphenyl-3-ol (**j**).

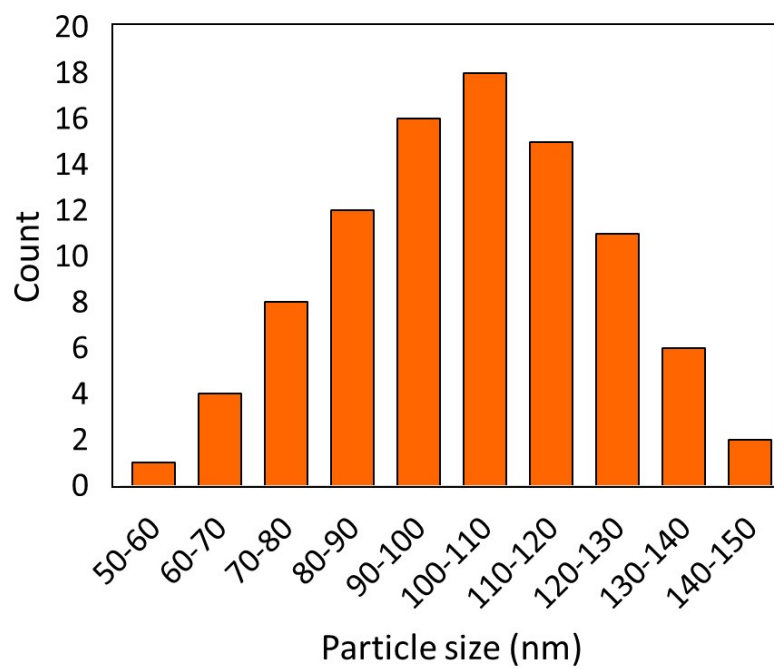

**Figure S11.** Size distribution diagram of the formed Pd nanoparticles.

### Calculations of mol% of VPMP@CLS-Pd catalyst:

4-Iodonitrobenzene (as reactant): 1.0 mmol = 0.249 g, and VPMP@CLS-Pd (as catalyst): 0.01 g were used.

From EDX analysis (Figure 2b), 3.5 wt% of the total weight of catalyst is related to Pd nanoparticles.

$3.5 \times 0.01 \text{ g} / 100 = 0.00035 \text{ g}$  (pure weight of Pd nanoparticles in 0.01 g of catalyst)

$\Rightarrow (0.00035 / 0.249) \times 100 = \mathbf{0.14 \text{ wt\%}}$  (weight percentage of the applied catalyst)

$0.00035 \text{ g (Pd)} = 0.00328 \text{ mmol (Pd)}$

$\Rightarrow (0.00328 \text{ mmol of Pd} / 1 \text{ mmol of reactant}) \times 100 = \mathbf{0.33 \text{ mol\%}}$
